# Supplementary material
Source: publisher figshare collection journal article supplement (https://frontiersin.figshare.com/ndownloader/files/22640765)
Supplement: Supplementary file [file 22640765]

# Supplementary Figures

## **Global repertoire of human antibodies against *Plasmodium falciparum* RIFINs, SURFINs, and STEVORs in a malaria exposed population**

Bernard N. Kanoi<sup>1\*</sup>, Hikaru Nagaoka<sup>1</sup>, Michael T. White<sup>2</sup>, Masayuki Morita<sup>1</sup>, Nirianne M. Q. Palacpac<sup>3</sup>, Edward H. Ntege<sup>4</sup>, Betty Balikagala<sup>5</sup>, Adoke Yeka<sup>6</sup>, Thomas G. Egwang<sup>7</sup>, Toshihiro Horii<sup>3</sup>, Takafumi Tsuboi<sup>1</sup>, Eizo Takashima<sup>1\*</sup>

<sup>1</sup>*Division of Malaria Research, Proteo-Science Center, Ehime University, Matsuyama, Ehime 790-8577, Japan*

<sup>2</sup>*Department of Parasites and Insect Vectors, Pasteur Institute, Paris, France*

<sup>3</sup>*Department of Malaria Vaccine Development, Research Institute for Microbial Diseases, Osaka University, Suita, 565-0871, Japan*

<sup>4</sup>*Department of Plastic and Reconstructive Surgery, University of the Ryukyus, Graduate School of Medicine and Hospital, Okinawa, 903-0215, Japan*

<sup>5</sup>*Department of Tropical Medicine and Parasitology, School of Medicine, Juntendo University, Tokyo, 113-8421, Japan*

<sup>6</sup>*Makerere University School of Public Health, Kampala, Uganda*

<sup>7</sup>*Med Biotech Laboratories, Plot 4-6 Bell Close, Port Bell Road Luzira, Kampala, Uganda*

\* Address correspondence to:

Eizo Takashima; takashima.eizo.mz@ehime-u.ac.jp

Bernard N. Kanoi: kanoi.bernard\_nganga.vx@ehime-u.ac.jp

Tel.: +81-89-927-8277; fax: +81-89-927-8528.

**Fig S1**

**A**

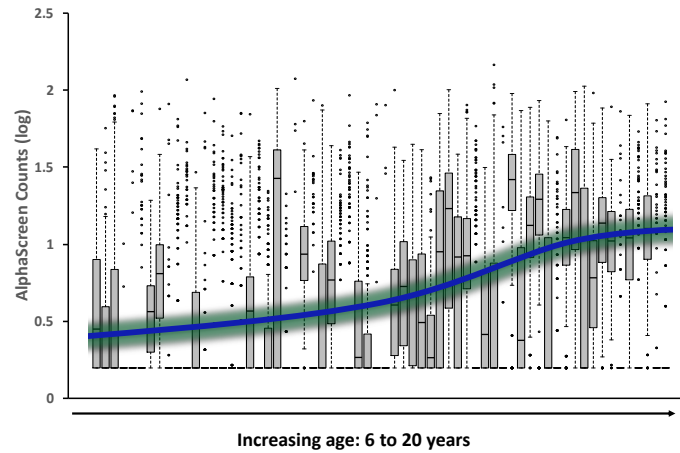

A. Overall seroreactivity of each individual showed an age dependent increasing trend. Box plots illustrate medians with 25<sup>th</sup> and 75<sup>th</sup> percentile and whiskers for 10<sup>th</sup> and 90<sup>th</sup> percentile of antibody responses to RIFINs, STEVORs, and SURFINs. The blue line indicates a trendline with confidence intervals presented as shadow.

**B**

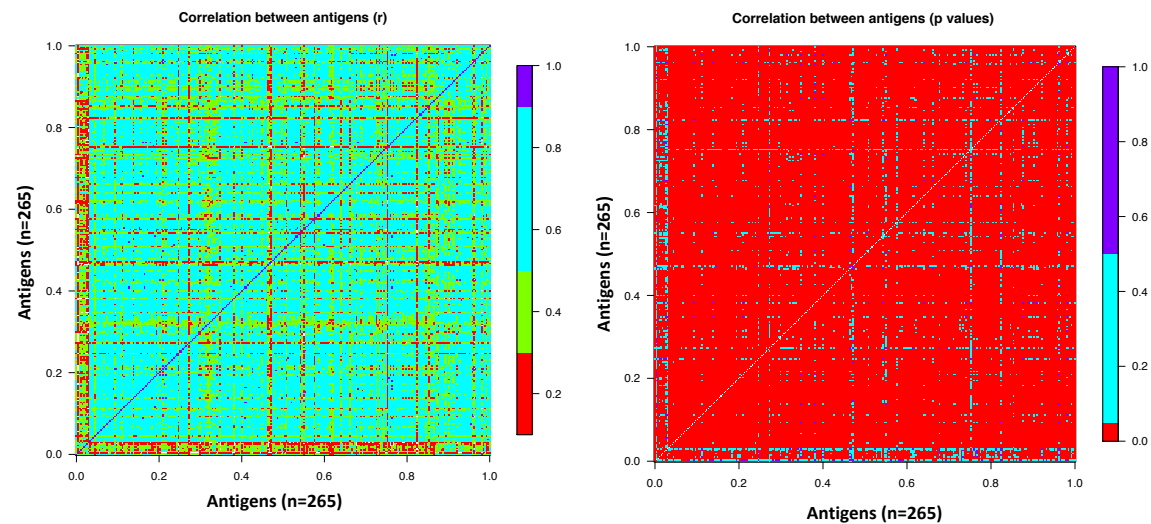

B. Antibody acquisition correlation matrix. The value score for the  $r$  correlation coefficients and the corresponding  $P$  values are shown on the right of each matrix.
